# Supplementary material for: Clinical Efficacy of Sodium-Glucose Cotransporter 2 Inhibitor and Glucagon-Like Peptide-1 Receptor Agonist Combination Therapy in Type 2 Diabetes Mellitus: Real-World Study
Source: PubMed Central journal article supplement — Diabetes Metab J. 2021 Nov 8;46(4):658–62. doi: 10.4093/dmj.2021.0232 (PMC9353570; doi:10.4093/dmj.2021.0232), 2021-11-08
Supplement: dmj-2021-0232-suppl1.pdf [file dmj-2021-0232-suppl1.pdf]

**Supplementary Table 1.** Baseline characteristics of the study participants

| Characteristic                    | Value       |
|-----------------------------------|-------------|
| Age, yr                           | 51.1 ± 10.6 |
| Female sex                        | 43 (41.3)   |
| Duration of diabetes, yr          | 11.7 ± 7.1  |
| Hypertension                      | 70 (67.3)   |
| Dyslipidemia                      | 101 (97.1)  |
| Diabetes complications            |             |
| Retinopathy                       | 50 (48.1)   |
| Nephropathy                       | 52 (50.0)   |
| Neuropathy                        | 29 (27.9)   |
| Cardiovascular disease            | 18 (17.3)   |
| Cerebrovascular disease           | 2 (1.9)     |
| Peripheral vascular disease       | 2 (1.9)     |
| Heart failure                     | 2 (1.9)     |
| Previous insulin user             | 27 (26.0)   |
| Use of concomitant diabetes drugs |             |
| Metformin                         | 102 (98.1)  |
| Sulfonylurea                      | 85 (81.7)   |
| Thiazolidinedione                 | 2 (1.9)     |
| Insulin                           | 11 (10.6)   |
| Combination sequence              |             |
| SGLT2 inhibitor first             | 48 (46.2)   |
| GLP-1RA first                     | 48 (46.2)   |
| Simultaneous addition             | 8 (7.7)     |
| SGLT2 inhibitor type              |             |
| Dapagliflozin                     | 71 (68.3)   |
| Empagliflozin                     | 33 (31.7)   |
| Dulaglutide dose, mg              |             |
| 0.75                              | 30 (28.8)   |
| 1.5                               | 74 (71.2)   |

Values are presented as mean ± standard deviation or number (%). SGLT2, sodium-glucose cotransporter 2; GLP-1RA, glucagon-like peptide-1 receptor agonist.
