# Supplementary material for: Clinical Efficacy of Sodium-Glucose Cotransporter 2 Inhibitor and Glucagon-Like Peptide-1 Receptor Agonist Combination Therapy in Type 2 Diabetes Mellitus: Real-World Study
Source: PubMed Central journal article supplement — Diabetes Metab J. 2021 Nov 8;46(4):658–62. doi: 10.4093/dmj.2021.0232 (PMC9353570; doi:10.4093/dmj.2021.0232), 2021-11-08
Supplement: dmj-2021-0232-suppl2.pdf [file dmj-2021-0232-suppl2.pdf]

**Supplementary Table 2.** Univariate linear regression analysis of the reduction in HbA1c after 1 year

| Variable             | Standardized b | P value |
|----------------------|----------------|---------|
| Sex                  | -0.076         | 0.446   |
| Age                  | -0.214         | 0.029   |
| Hypertension         | -0.101         | 0.310   |
| Dyslipidemia         | 0.033          | 0.739   |
| C-peptide            | 0.043          | 0.668   |
| Baseline HbA1c       | 0.764          | <0.001  |
| Baseline FPG         | 0.233          | 0.017   |
| eGFR                 | 0.079          | 0.428   |
| Body weight          | 0.102          | 0.302   |
| BMI                  | 0.026          | 0.793   |
| Duration of diabetes | -0.121         | 0.222   |
| Combination sequence | -0.105         | 0.309   |
| Dulaglutide dose     | -0.041         | 0.682   |

HbA1c, glycosylated hemoglobin; FPG, fasting plasma glucose; eGFR, estimated glomerular filtration rate; BMI, body mass index.
