# Supplementary material for: Clinical Efficacy of Sodium-Glucose Cotransporter 2 Inhibitor and Glucagon-Like Peptide-1 Receptor Agonist Combination Therapy in Type 2 Diabetes Mellitus: Real-World Study
Source: PubMed Central journal article supplement — Diabetes Metab J. 2021 Nov 8;46(4):658–62. doi: 10.4093/dmj.2021.0232 (PMC9353570; doi:10.4093/dmj.2021.0232), 2021-11-08
Supplement: dmj-2021-0232-suppl4.pdf [file dmj-2021-0232-suppl4.pdf]

**Supplementary Table 4.** Adverse events

| Adverse event                | 3 months  | 6 months | 1 year  |
|------------------------------|-----------|----------|---------|
| Total                        | 13 (12.5) | 8 (7.7)  | 9 (8.7) |
| Nausea                       | 4 (3.8)   | 2 (1.9)  | 2 (1.9) |
| Diarrhea                     | 2 (1.9)   | 2 (1.9)  | 0       |
| Constipation                 | 2 (1.9)   | 0        | 0       |
| Abdominal pain               | 1 (1.0)   | 1 (1.0)  | 1 (1.0) |
| Hypoglycemia (mild)          | 1 (1.0)   | 1 (1.0)  | 5 (4.8) |
| Injection site pain          | 1 (1.0)   | 0        | 0       |
| Injection site itching sense | 2 (1.9)   | 2 (1.9)  | 1 (1.0) |

Values are presented as number (%).
