# Supplementary material for: Clinical Efficacy of Sodium-Glucose Cotransporter 2 Inhibitor and Glucagon-Like Peptide-1 Receptor Agonist Combination Therapy in Type 2 Diabetes Mellitus: Real-World Study
Source: PubMed Central journal article supplement — Diabetes Metab J. 2021 Nov 8;46(4):658–62. doi: 10.4093/dmj.2021.0232 (PMC9353570; doi:10.4093/dmj.2021.0232), 2021-11-08
Supplement: dmj-2021-0232-suppl5.pdf [file dmj-2021-0232-suppl5.pdf]

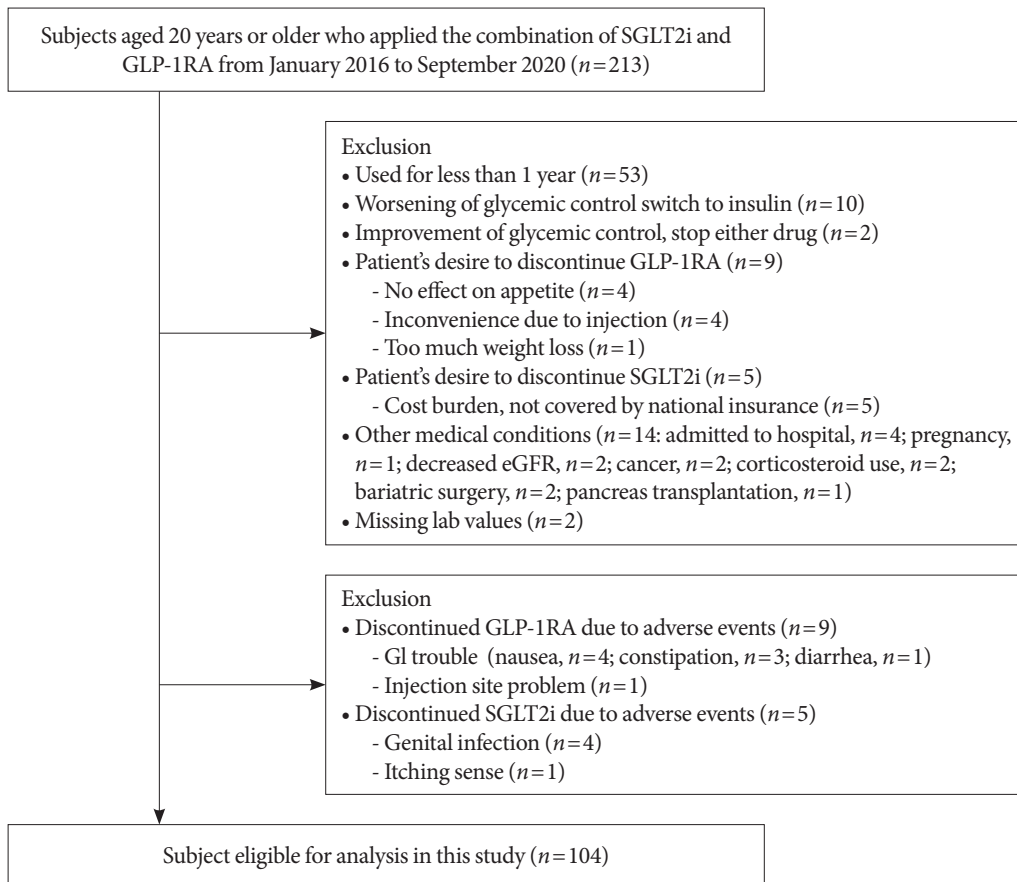

**Supplementary Fig. 1.** Flow diagram showing the selection of the study population. SGLT2i, sodium-glucose cotransporter 2 inhibitor; GLP-1RA, glucagon-like peptide-1 receptor agonist; eGFR, estimated glomerular filtration rate.
