# Supplementary material for: Clinical Efficacy of Sodium-Glucose Cotransporter 2 Inhibitor and Glucagon-Like Peptide-1 Receptor Agonist Combination Therapy in Type 2 Diabetes Mellitus: Real-World Study
Source: PubMed Central journal article supplement — Diabetes Metab J. 2021 Nov 8;46(4):658–62. doi: 10.4093/dmj.2021.0232 (PMC9353570; doi:10.4093/dmj.2021.0232), 2021-11-08
Supplement: dmj-2021-0232-suppl6.pdf [file dmj-2021-0232-suppl6.pdf]

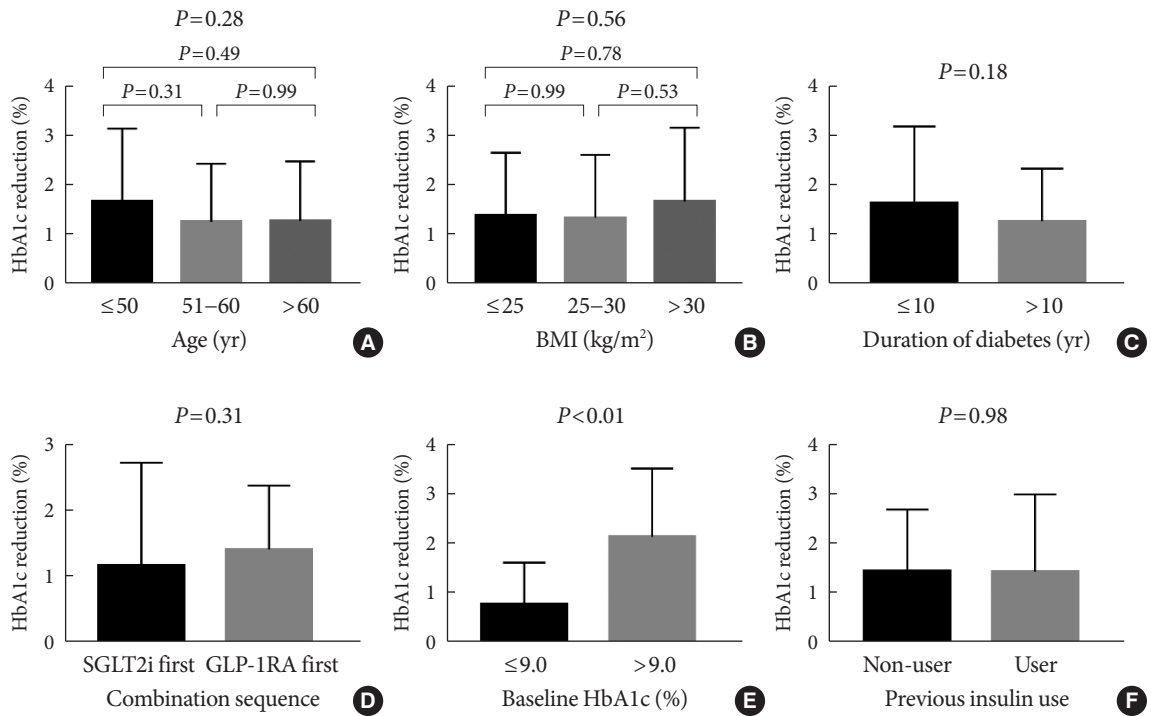

**Supplementary Fig. 2.** Subgroup analyses for changes in glycosylated hemoglobin (HbA1c) levels according to age, body mass index (BMI), duration of diabetes, combination sequence, baseline HbA1c levels, and previous use of insulin. Values are presented as mean  $\pm$  standard deviation. SGLT2i, sodium-glucose cotransporter 2 inhibitor; GLP-1RA, glucagon-like peptide-1 receptor agonist.
